# Supplementary material for: Molecular dynamics simulations to elucidate translocation and permeation of active from lipid nanoparticle to skin: complemented by experiments
Source: Royal Society of Chemistry journal article supplement (doi:10.1039/d1nr02652f), 2021-01-01
Supplement: d1nr02652f1.pdf [file d1nr02652f1.pdf]

## Supporting Information

### Molecular dynamics simulations to elucidate translocation and permeation of active from lipid nanoparticle to skin: complemented by experiments

Krishna M. Gupta\*, Surajit Das, Pui Shan Chow

Institute of Chemical & Engineering Sciences, A\*STAR (Agency for Science, Technology and Research), 1 Pesek Road, Jurong Island, Singapore 627833

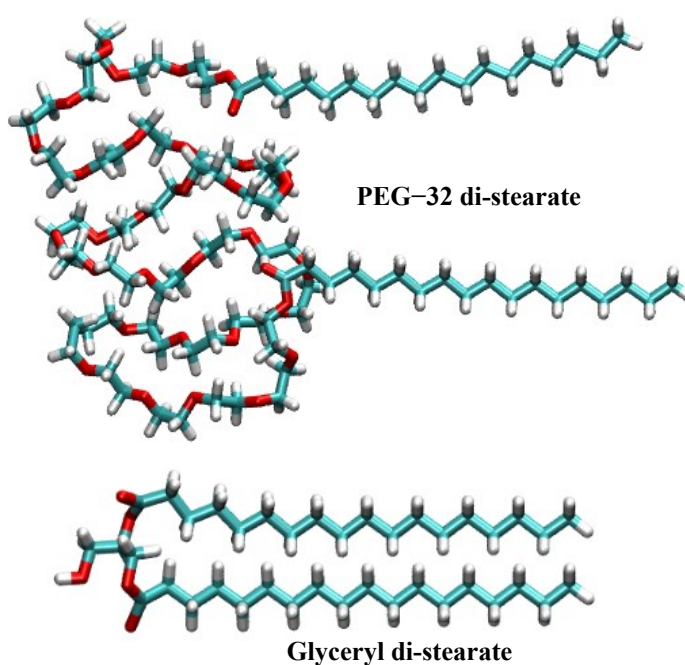

**Fig. S1.** Three-dimensional (3D) molecular structure of Gelucire® 50/13 which is a mixture of polyethylene glycol-32 (PEG-32) di-stearate and glyceryl di-stearate (close to supplier's information). Color code: O, red; C, cyan; H, white.

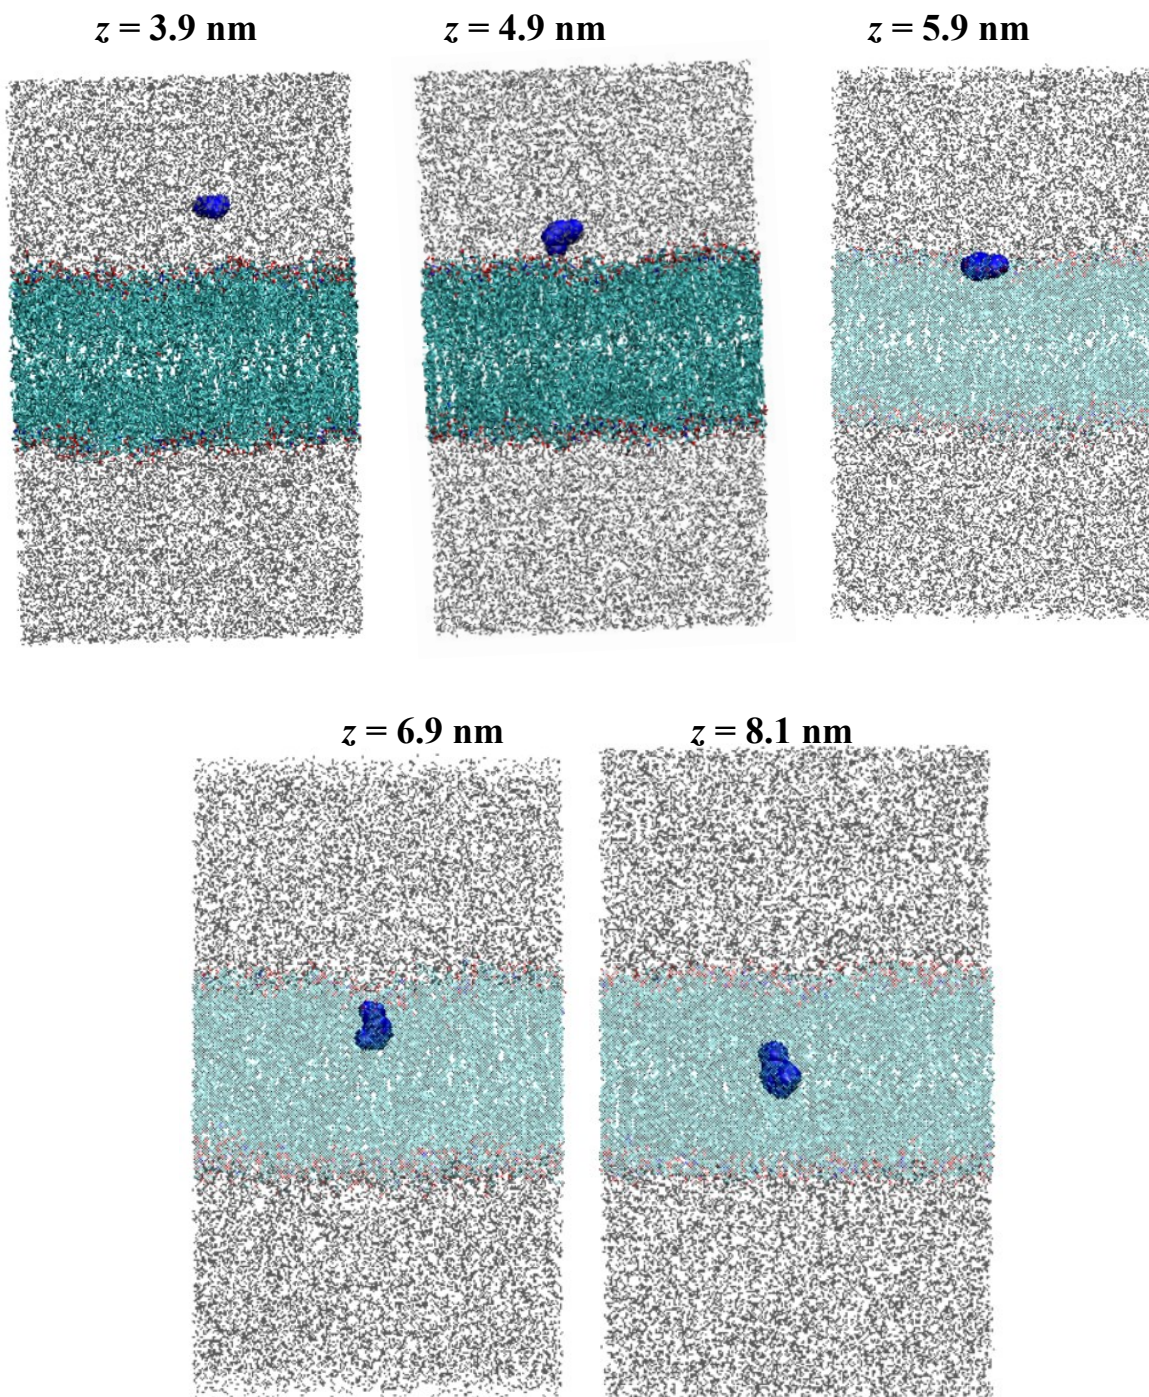

**Fig. S2.** Initial simulation snapshots for umbrella sampling simulations at few  $z$  locations of FA. For clear visualization, the skin bilayer is made transparent when FA molecule enters into skin.

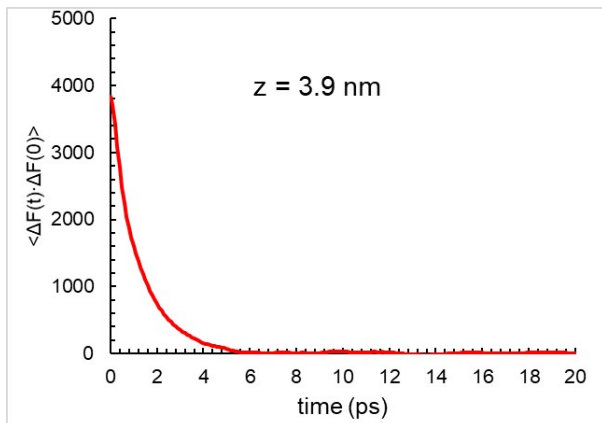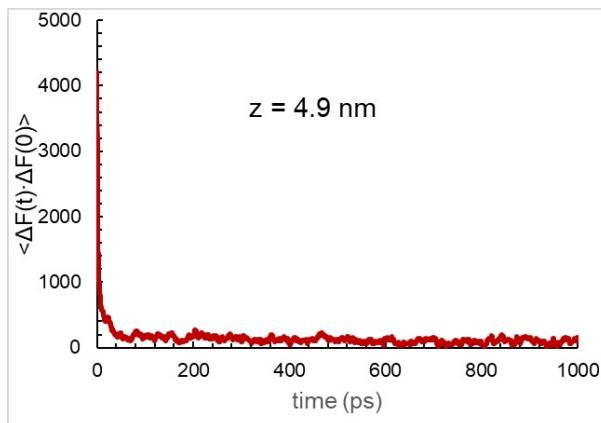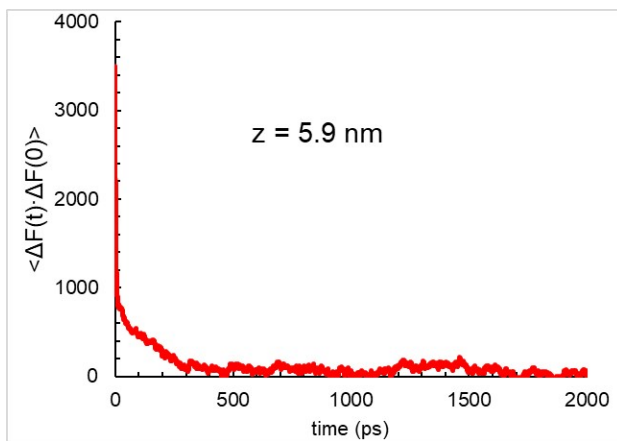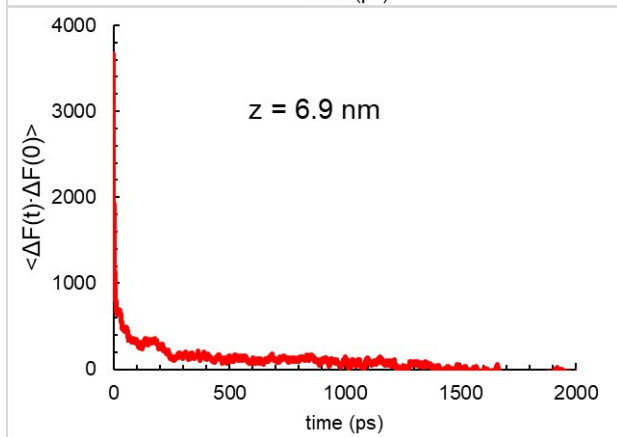

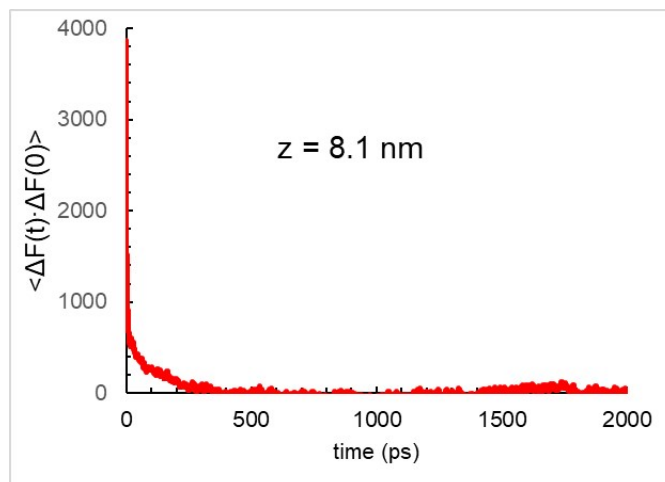

**Fig. S3:** Autocorrelation functions of  $\Delta F$  using 20 ns simulation trajectories at  $z$  locations corresponding to Fig. S2 without NP.

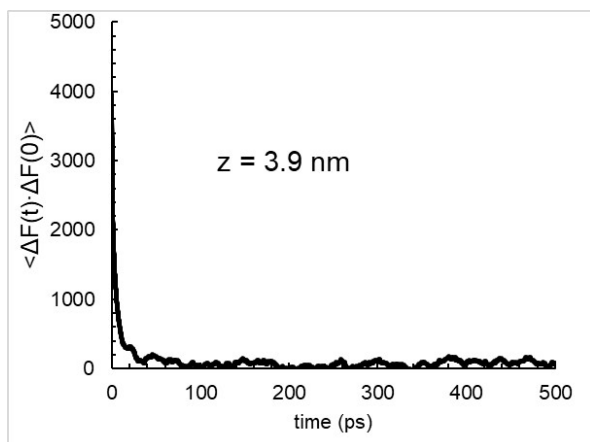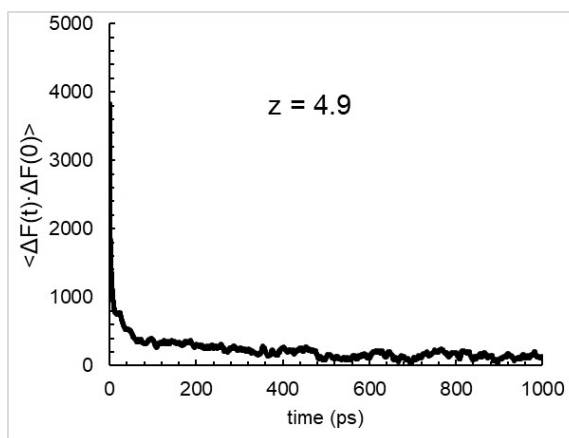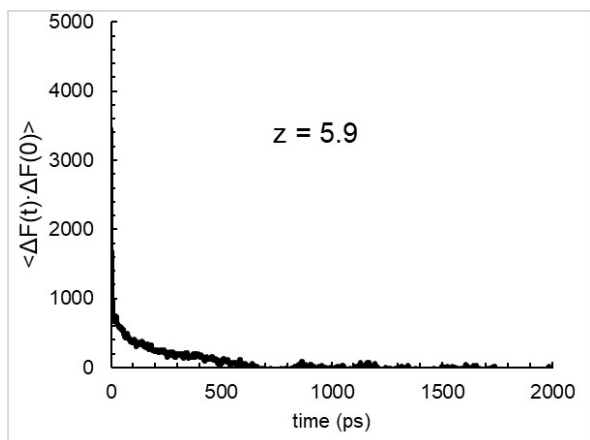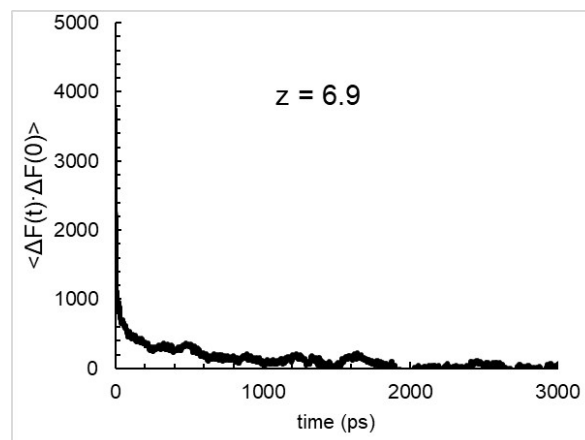

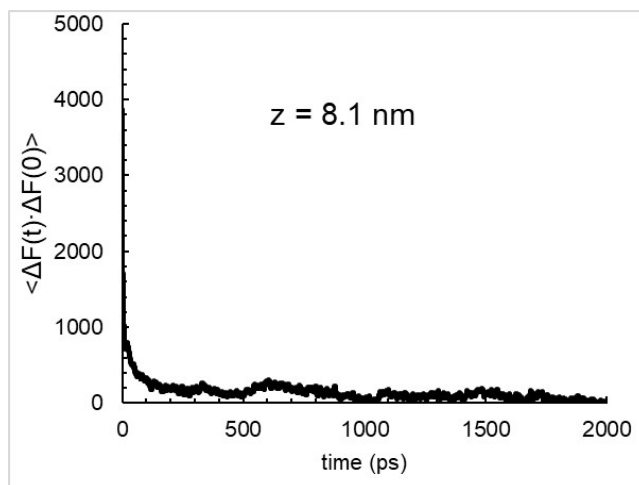

**Fig. S4:** Autocorrelation functions of  $\Delta F$  using 20 ns simulation trajectories at  $z$  locations corresponding to Fig. S2 in the presence of NP.

**Table S1:** Composition of nanoparticle dispersion.

| Ingredients                 | % (w/w) |
|-----------------------------|---------|
| Gelucire <sup>®</sup> 50/13 | 10.0    |
| Ferulic acid                | 0.5     |
| Water                       | 89.5    |

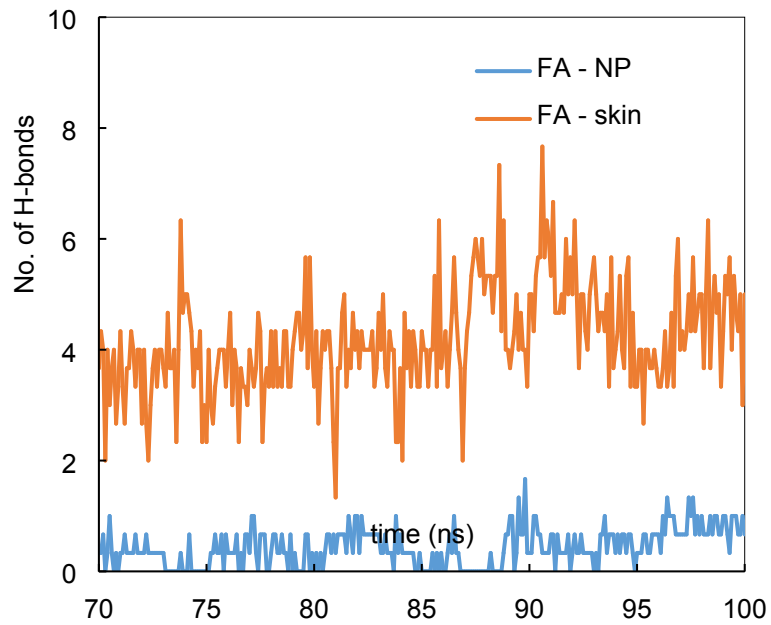

**Fig. S5.** Hydrogen-bonds between FA and NP as well as FA and skin.

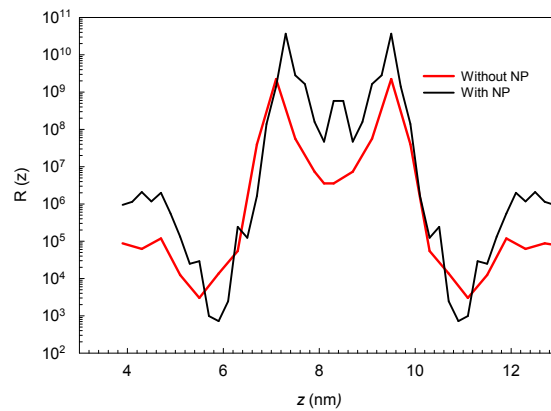

**Fig. S6.** Resistance of permeation  $R(z)$  of FA along the skin bilayer normal with and without NP.
